# Supplementary material
Source: PubMed Central journal article supplement (PMC4158029)
Supplement: NIHMS438362-supplement-1.pdf [file NIHMS438362-supplement-1.pdf]

## SUPPLEMENTAL FILE

### Effect of MKEY treatment on the expression of MMP2 and MMP9 in the aortae of PPE-infused mice

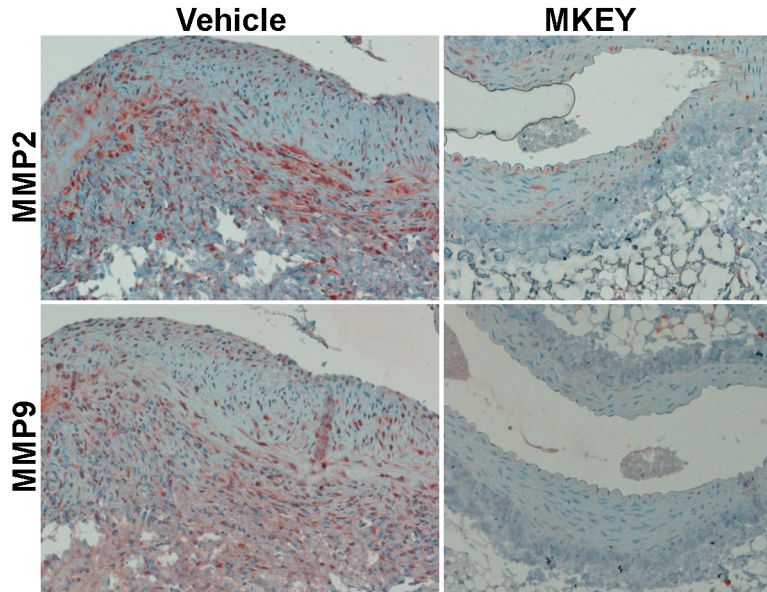

Infrarenal aortae were harvested from aneurysmal mice treated with vehicle (left panels) or MKEY 14 days after PPE infusion, sectioned, and fixed with cold acetone and . The sections were sequentially incubated with a rabbit anti-mouse MMP2 (up panels) or MMP9 (low panels) antibody, a biotinylated anti-rabbit IgG, streptavidin-peroxidase, and peroxidase substrate AEC. Representative images showed marked attenuation of MMP2 and MMP9 expression in a PPE-infused, MKEY-treated mouse aorta as compared to a PPE-infused, MKEY-treated mouse aorta. These staining patterns were reproduced in 3 mice for each treatment group. Red color in each panel indicated positive staining for MMP2 or MMP9. Original magnification for all images is 200X.
